# Supplementary material
Source: PubMed Central journal article supplement (PMC6893116)
Supplement: NIHMS1534337-supplement-Supplemental_Digital_Content_1.pdf [file NIHMS1534337-supplement-Supplemental_Digital_Content_1.pdf]

**SUPPLEMENTAL DIGITAL CONTENT 1.** Case-control analyses for psychiatric conditions before the index date, stratified by index calendar year.

| Condition <sup>a</sup> | Bilateral oophorectomy<br>(N=723 1988-1997,<br>N=930 1998-2007) |      | Control women<br>(N=723 1988-1997,<br>N=930 1998-2007) |      | Unadjusted models <sup>b</sup> |          | Adjusted models <sup>c</sup> |          | Interaction<br><i>P</i> |  |
|------------------------|-----------------------------------------------------------------|------|--------------------------------------------------------|------|--------------------------------|----------|------------------------------|----------|-------------------------|--|
|                        | <i>N</i>                                                        | %    | <i>N</i>                                               | %    | Odds ratio<br>(95% CI)         | <i>P</i> | Odds ratio<br>(95% CI)       | <i>P</i> |                         |  |
| Mood disorders         |                                                                 |      |                                                        |      |                                |          |                              |          |                         |  |
| Decade 1988-1997       | 147                                                             | 20.3 | 108                                                    | 14.9 | 1.44 (1.10-1.88)               | 0.009    | 1.42 (1.08-1.88)             | 0.01     | 0.04                    |  |
| Decade 1998-2007       | 382                                                             | 41.1 | 238                                                    | 25.6 | 2.01 (1.65-2.46)               | <0.001   | 2.03 (1.65-2.49)             | <0.001   |                         |  |
| Bipolar disorders      |                                                                 |      |                                                        |      |                                |          |                              |          |                         |  |
| Decade 1988-1997       | 11                                                              | 1.5  | 4                                                      | 0.6  | 2.75 (0.88-8.64)               | 0.08     | 2.52 (0.79-7.98)             | 0.12     | 0.42                    |  |
| Decade 1998-2007       | 20                                                              | 2.2  | 14                                                     | 1.5  | 1.46 (0.72-2.96)               | 0.29     | 1.44 (0.70-2.96)             | 0.32     |                         |  |
| Anxiety disorders      |                                                                 |      |                                                        |      |                                |          |                              |          |                         |  |
| Decade 1988-1997       | 94                                                              | 13.0 | 69                                                     | 9.5  | 1.40 (1.01-1.94)               | 0.04     | 1.37 (0.99-1.91)             | 0.06     | 0.65                    |  |
| Decade 1998-2007       | 142                                                             | 15.3 | 120                                                    | 12.9 | 1.24 (0.94-1.63)               | 0.13     | 1.24 (0.94-1.64)             | 0.13     |                         |  |
| Schizophrenia          |                                                                 |      |                                                        |      |                                |          |                              |          |                         |  |
| Decade 1988-1997       | 5                                                               | 0.7  | 5                                                      | 0.7  | 1.00 (0.29-3.45)               | 1.00     | 1.06 (0.30-3.71)             | 0.93     | 0.14                    |  |
| Decade 1998-2007       | 2                                                               | 0.2  | 8                                                      | 0.9  | 0.25 (0.05-1.18)               | 0.08     | 0.23 (0.05-1.11)             | 0.07     |                         |  |
| Somatoform disorders   |                                                                 |      |                                                        |      |                                |          |                              |          |                         |  |
| Decade 1988-1997       | 17                                                              | 2.4  | 2                                                      | 0.3  | 8.50 (1.96-36.79)              | 0.004    | 8.38 (1.93-36.47)            | 0.005    | 0.14                    |  |
| Decade 1998-2007       | 17                                                              | 1.8  | 7                                                      | 0.8  | 2.43 (1.01-5.86)               | 0.048    | 2.29 (0.94-5.57)             | 0.07     |                         |  |
| Personality disorders  |                                                                 |      |                                                        |      |                                |          |                              |          |                         |  |
| Decade 1988-1997       | 15                                                              | 2.1  | 6                                                      | 0.8  | 2.50 (0.97-6.44)               | 0.06     | 2.43 (0.94-6.30)             | 0.07     | 0.55                    |  |
| Decade 1998-2007       | 22                                                              | 2.4  | 14                                                     | 1.5  | 1.67 (0.81-3.41)               | 0.16     | 1.68 (0.81-3.47)             | 0.16     |                         |  |
| Dissociative disorders |                                                                 |      |                                                        |      |                                |          |                              |          |                         |  |
| Decade 1988-1997       | 5                                                               | 0.7  | 0                                                      | 0.0  | --                             | --       | --                           | --       | --                      |  |
| Decade 1998-2007       | 7                                                               | 0.8  | 8                                                      | 0.9  | 0.88 (0.32-2.41)               | 0.80     | 0.79 (0.28-2.23)             | 0.65     |                         |  |
| Adjustment disorders   |                                                                 |      |                                                        |      |                                |          |                              |          |                         |  |
| Decade 1988-1997       | 45                                                              | 6.2  | 35                                                     | 4.8  | 1.32 (0.83-2.11)               | 0.24     | 1.38 (0.86-2.22)             | 0.18     | 0.31                    |  |
| Decade 1998-2007       | 78                                                              | 8.4  | 77                                                     | 8.3  | 1.01 (0.73-1.41)               | 0.93     | 1.02 (0.73-1.43)             | 0.89     |                         |  |

<sup>a</sup> Psychiatric conditions before the index date were determined from abstraction of the medical records.

<sup>b</sup> Odds ratios calculated using conditional logistic regression models (matched pairs).

## SUPPLEMENTAL DIGITAL CONTENT 1. *Continued*

---

<sup>c</sup> Odds ratios calculated using conditional logistic regression models (matched pairs), adjusted for race (white vs nonwhite), years of education ( $\leq 12$ , 13-16,  $> 16$ ), and quartiles of household income ( $< \$42,000$ ,  $\$42,000-56,999$ ,  $\$57,000-71,999$ ,  $\geq \$72,000$ ). The interaction p-values were calculated using adjusted conditional logistic regression models (matched pairs) which also included a variable for the multiplicative interaction between each psychiatric condition and decade (1988-1997 vs 1998-2007). Women missing years of education (1988-1997: 1 case, 11 controls; 1998-2007: 2 cases, 24 controls) were assigned to the  $\leq 12$  years group and women missing household income (1988-1997: 2 cases, 2 controls; 1998-2007: 4 cases, 0 controls) were assigned to the second quartile.
