# Supplementary material
Source: PubMed Central journal article supplement (PMC6893116)
Supplement: NIHMS1534337-supplement-Supplemental_Digital_Content_2.pdf [file NIHMS1534337-supplement-Supplemental_Digital_Content_2.pdf]

**SUPPLEMENTAL DIGITAL CONTENT 2.** Overall case-control analyses for a subset of women, excluding 186 matched pairs in which the control underwent hysterectomy before index date, or in which the case did not undergo hysterectomy on or before index date.

| Condition <sup>a</sup>            | Bilateral oophorectomy (N=1,467) |      | Control women (N=1,467) |      | Unadjusted models <sup>b</sup> |        | Adjusted models <sup>c</sup>  |        |
|-----------------------------------|----------------------------------|------|-------------------------|------|--------------------------------|--------|-------------------------------|--------|
|                                   | N                                | %    | N                       | %    | Odds ratio (95% CI)            | P      | Odds ratio (95% CI)           | P      |
| Mood disorders                    | 475                              | 32.4 | 288                     | 19.6 | 1.97 (1.66-2.35)               | <0.001 | 1.95 (1.63-2.32)              | <0.001 |
| Bipolar disorders                 | 28                               | 1.9  | 17                      | 1.2  | 1.69 (0.91-3.13)               | 0.10   | 1.55 (0.83-2.89)              | 0.17   |
| Anxiety disorders                 | 209                              | 14.2 | 154                     | 10.5 | 1.43 (1.14-1.79)               | 0.002  | 1.41 (1.12-1.78)              | 0.003  |
| Schizophrenia                     | 7                                | 0.5  | 9                       | 0.6  | 0.78 (0.29-2.09)               | 0.62   | 0.81 (0.30-2.21)              | 0.69   |
| Somatoform disorders              | 28                               | 1.9  | 4                       | 0.3  | 7.00 (2.46-20.0)               | <0.001 | 6.62 (2.31-19.0)              | <0.001 |
| Personality disorders             | 34                               | 2.3  | 18                      | 1.2  | 2.00 (1.10-3.64)               | 0.02   | 1.96 (1.07-3.60)              | 0.03   |
| Dissociative disorders            | 12                               | 0.8  | 7                       | 0.5  | 1.71 (0.67-4.35)               | 0.26   | 1.60 (0.61-4.17)              | 0.34   |
| Adjustment disorders              | 110                              | 7.5  | 101                     | 6.9  | 1.10 (0.83-1.46)               | 0.52   | 1.13 (0.85-1.50)              | 0.41   |
| Number of conditions <sup>d</sup> |                                  |      |                         |      |                                |        |                               |        |
| 0                                 | 866                              | 59.0 | 1,049                   | 71.5 | 1.00 (reference) <sup>e</sup>  |        | 1.00 (reference) <sup>e</sup> |        |
| 1                                 | 380                              | 25.9 | 279                     | 19.0 | 1.63 (1.37-1.95)               | <0.001 | 1.64 (1.37-1.96)              | <0.001 |
| 2                                 | 166                              | 11.3 | 112                     | 7.6  | 1.85 (1.42-2.42)               | <0.001 | 1.84 (1.40-2.40)              | <0.001 |
| ≥3                                | 55                               | 3.7  | 27                      | 1.8  | 2.65 (1.62-4.33)               | <0.001 | 2.58 (1.57-4.25)              | <0.001 |

<sup>a</sup> Psychiatric conditions before the index date were determined from abstraction of the medical records.

<sup>b</sup> Odds ratios calculated using conditional logistic regression models (matched pairs).

<sup>c</sup> Odds ratios calculated using conditional logistic regression models (matched pairs), adjusted for race (white vs nonwhite), years of education (≤12, 13-16, >16), and quartiles of household income (<\$42,000, \$42,000-56,999, \$57,000-71,999, ≥\$72,000). Women missing years of education (3 cases, 32 controls) were assigned to the ≤12 years group and women missing household income (5 cases, 2 controls) were assigned to the second quartile.

<sup>d</sup> Total number of psychiatric conditions before the index date for each woman.

<sup>e</sup> Cochran-Armitage test for linear trend in the odds ratios,  $P < 0.001$  for the unadjusted models and  $P < 0.001$  for the adjusted models.
